# Supplementary material for: Fitting and validating the genomic evaluation model to Polish Holstein-Friesian cattle
Source: PubMed Central journal article supplement — J Appl Genet. 2011 May 7;52(3):363–6. doi: 10.1007/s13353-011-0047-z (PMC3132311; doi:10.1007/s13353-011-0047-z), 2011-05-07
Supplement: 13353_2011_47_MOESM1_ESM.pdf [file 13353_2011_47_MOESM1_ESM.pdf]

| trait                           | standard deviation |        |        | correlation (EBV, DGV) |
|---------------------------------|--------------------|--------|--------|------------------------|
|                                 | N <sub>a</sub>     | EBV    | DGV    |                        |
| milk yield                      | 1 216              | 377.93 | 359.05 | 0.98                   |
| protein yield                   | 1 216              | 10.50  | 9.75   | 0.98                   |
| fat yield                       | 1 216              | 12.91  | 12.26  | 0.98                   |
| somatic cell score              | 1 127              | 0.48   | 0.45   | 0.97                   |
| non return rates for heifers    | 1 126              | 0.04   | 0.04   | 0.81                   |
| non return rates for cows       | 1 128              | 0.05   | 0.04   | 0.78                   |
| int. calving – 1st insemination | 1 126              | 10.03  | 9.47   | 0.87                   |
| days open                       | 1 122              | 15.31  | 13.89  | 0.88                   |
| body depth                      | 926                | 10.21  | 9.40   | 0.92                   |
| chest width                     | 915                | 10.96  | 9.83   | 0.91                   |
| dairy character                 | 890                | 6.86   | 6.54   | 0.93                   |
| foot angle                      | 948                | 10.68  | 9.69   | 0.87                   |
| fore udder                      | 907                | 9.27   | 8.88   | 0.92                   |
| front teat placement            | 880                | 10.06  | 9.57   | 0.95                   |
| overall conformation score      | 947                | 6.06   | 5.69   | 0.96                   |
| overall feet and leg score      | 939                | 8.00   | 7.26   | 0.90                   |
| overall udder score             | 937                | 6.61   | 6.08   | 0.92                   |
| rear leg rear view              | 1195               | 10.52  | 9.98   | 0.83                   |
| rear leg set                    | 955                | 10.92  | 10.03  | 0.91                   |
| rear udder height               | 908                | 7.33   | 6.88   | 0.95                   |
| rump angle                      | 920                | 10.80  | 10.29  | 0.94                   |
| rump width                      | 937                | 10.40  | 9.56   | 0.95                   |
| size                            | 1085               | 6.36   | 6.08   | 0.98                   |
| stature                         | 930                | 7.27   | 7.11   | 0.93                   |
| teat length                     | 867                | 11.08  | 10.25  | 0.95                   |
| type and conformation score     | 978                | 6.17   | 5.85   | 0.94                   |
| udder depth                     | 911                | 9.19   | 8.50   | 0.95                   |
| udder support                   | 926                | 8.77   | 8.15   | 0.92                   |
| udder width                     | 897                | 7.38   | 6.95   | 0.93                   |
