# Supplementary material for: Fitting and validating the genomic evaluation model to Polish Holstein-Friesian cattle
Source: PubMed Central journal article supplement — J Appl Genet. 2011 May 7;52(3):363–6. doi: 10.1007/s13353-011-0047-z (PMC3132311; doi:10.1007/s13353-011-0047-z), 2011-05-07
Supplement: 13353_2011_47_MOESM4_ESM.pdf [file 13353_2011_47_MOESM4_ESM.pdf]

Table 2

| Trait         | Pedigree index |           | Genomic enhanced breeding value |           |
|---------------|----------------|-----------|---------------------------------|-----------|
|               | intercept      | slope     | intercept                       | slope     |
| milk yield    | 83.97±84.44    | 0.26±0.12 | -55.13±54.67                    | 0.96±0.14 |
| fat yield     | 2.47± 2.17     | 0.26±0.13 | 0.91± 1.56                      | 0.62±0.13 |
| protein yield | 1.95± 2.44     | 0.29±0.10 | 1.24± 1.44                      | 0.70±0.11 |
