# Supplementary figures and images for: Fitting and validating the genomic evaluation model to Polish Holstein-Friesian cattle
Source: PubMed Central journal article supplement — J Appl Genet. 2011 May 7;52(3):363–6. doi: 10.1007/s13353-011-0047-z (PMC3132311; doi:10.1007/s13353-011-0047-z), 2011-05-07

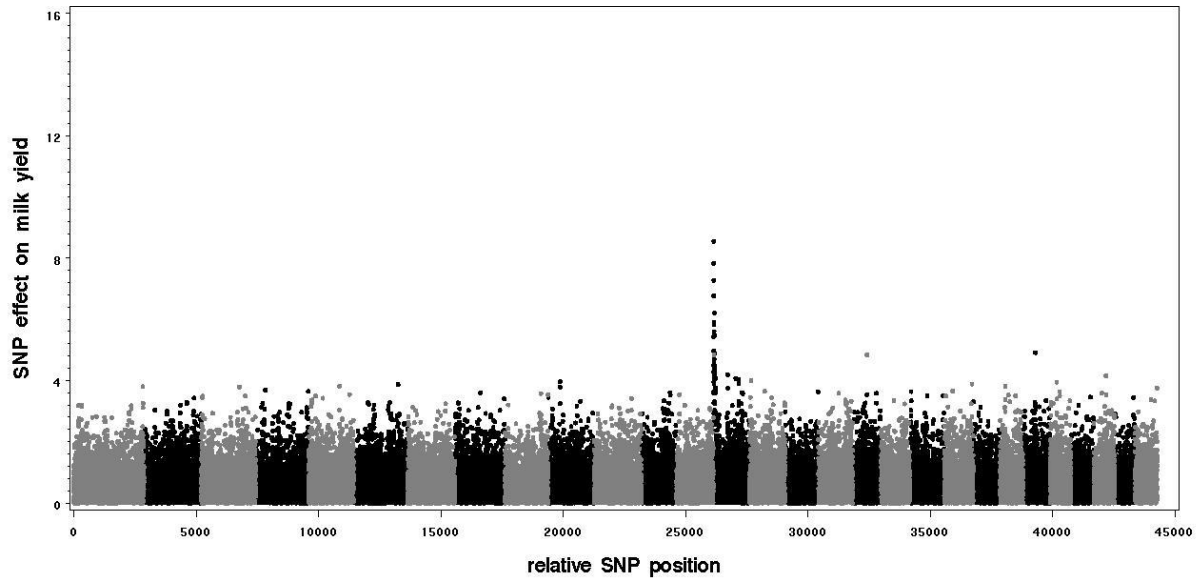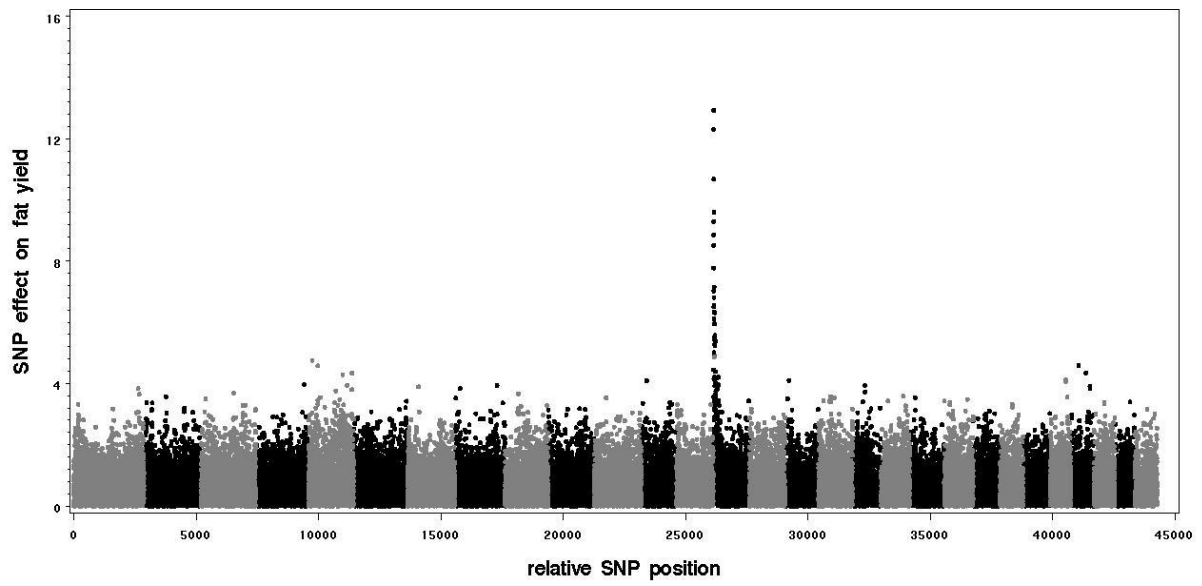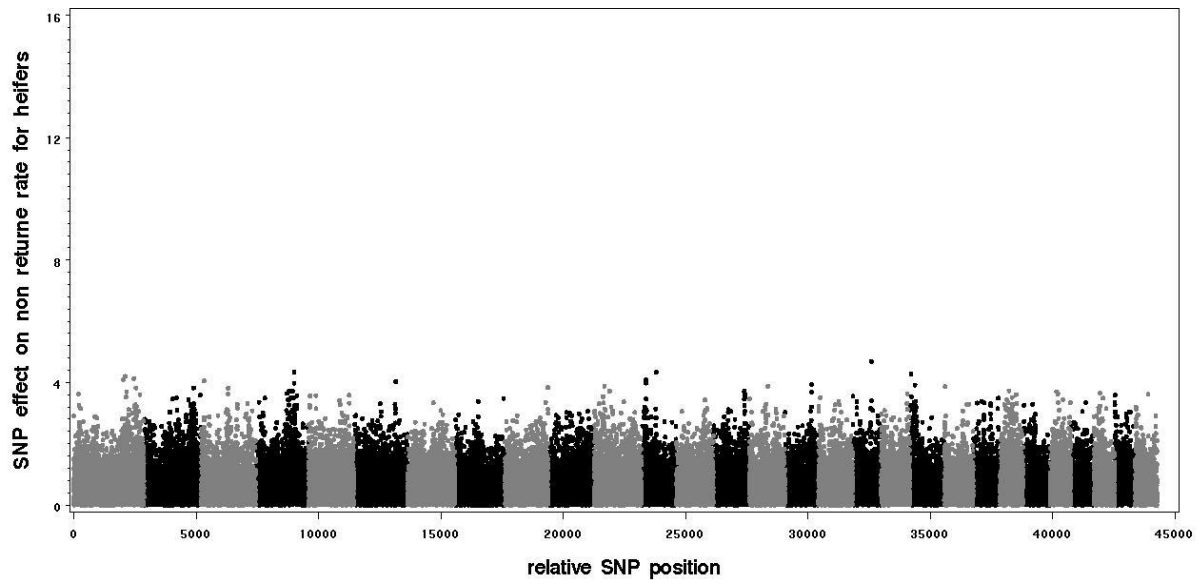

Supplement: 13353_2011_47_MOESM2_ESM.pdf [file 13353_2011_47_MOESM2_ESM.pdf]

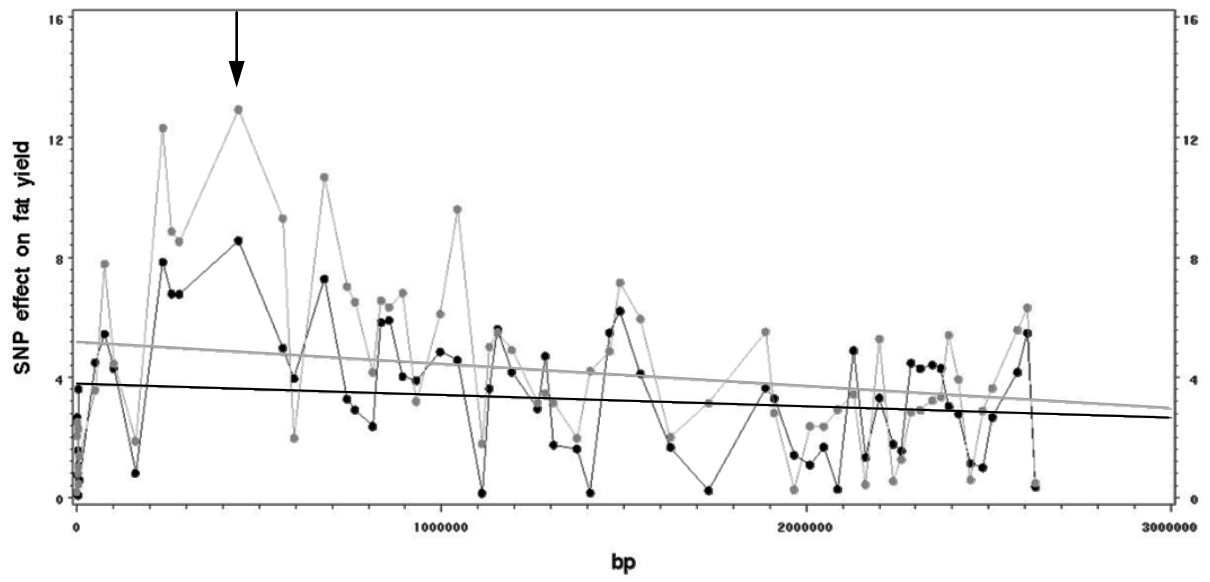

Supplement: 13353_2011_47_MOESM3_ESM.pdf [file 13353_2011_47_MOESM3_ESM.pdf]
